# Supplementary material for: Nutritional knowledge as a determinant of vitamin and mineral supplementation during pregnancy
Source: PubMed Central journal article supplement (PMC3933411; doi:10.1186/1471-2458-13-1105), 2013-12-01
Supplement: 1471-2458-13-1105-S1.pdf [file 1471-2458-13-1105-S1.pdf]

## Additional file 1. Nutritional knowledge questionnaire

|    | Question                                                                            | Answer |    |            |
|----|-------------------------------------------------------------------------------------|--------|----|------------|
|    |                                                                                     | yes    | no | Don't know |
| 1  | During pregnancy a varied diet is recommended                                       |        |    |            |
| 2  | A pregnant woman should not eat for two                                             |        |    |            |
| 3  | During pregnancy it is recommended to eat bread, cereal, vegetables and fresh fruit |        |    |            |
| 4  | The recommended dairy quantity during pregnancy is 600 grams.                       |        |    |            |
| 5  | During pregnancy it is recommended to increase the consumption of proteins          |        |    |            |
| 6  | The recommended weight gain during pregnancy is 9-12,5 kg.                          |        |    |            |
| 7  | Pregnant women should eat 4,5 times a day                                           |        |    |            |
| 8  | Food with quality proteins are: meat, eggs, milk                                    |        |    |            |
| 9  | Healthy fats are from : sunflower oil, soya, olives                                 |        |    |            |
| 10 | Food rich in iron are: eggs, meat, spinach, liver, beans                            |        |    |            |
| 11 | Food rich in folic acid are green vegetable                                         |        |    |            |
| 12 | Food rich in calcium are: milk, fish, green vegetables                              |        |    |            |
| 13 | Folic acid is important in the development of the nervous system.                   |        |    |            |
| 14 | A diet lacking iron leads to anaemia                                                |        |    |            |
| 15 | Calcium is important in the growth of teeth and bones.                              |        |    |            |
| 16 | Iodine is important for the intellectual development of the child                   |        |    |            |
| 17 | Alcohol is damaging during pregnancy                                                |        |    |            |
| 18 | Breast milk is the best nourishment for the child.                                  |        |    |            |
| 19 | Lack of iron in the baby's diet leads to anaemia.                                   |        |    |            |
| 20 | Anaemia appears in babies fed pasta and the like.                                   |        |    |            |
| 21 | Lack of vitamin D leads to rickets.                                                 |        |    |            |
| 22 | A diet lacking proteins slows down growth.                                          |        |    |            |
| 23 | In the first 6 months a diet of breast milk only is recommended.                    |        |    |            |
| 24 | Breast milk provides an adequate quantity of energy and nutrients.                  |        |    |            |
| 25 | Breast milk protects the baby from infections.                                      |        |    |            |
| 26 | Decreasing the calorie input leads to decreased lactation.                          |        |    |            |
| 27 | Protein consumption should be increased during lactation.                           |        |    |            |
| 28 | While breastfeeding the consumption of 2-3 litres of liquids a day is recommended.  |        |    |            |
| 29 | Beer consumption increases the quantity of milk.                                    |        |    |            |
